# Supplementary material for: Safety of Intranasal Quadrivalent Live Attenuated Influenza Vaccine (QLAIV) in Children and Adolescents: A Pilot Prospective Cohort Study in England
Source: PubMed Central journal article supplement — Drug Saf. 2016 Jan 21;39:323–33. doi: 10.1007/s40264-015-0384-7 (PMC4796333; doi:10.1007/s40264-015-0384-7), 2016-01-21

## **Electronic Supplementary Material 1**

### **Article Title**

Safety of Intranasal Quadrivalent Live Attenuated Influenza Vaccine (QLAIV) in Children and Adolescents: A Post Marketing Prospective Cohort Study in England in the 2014-15 season

### **Journal**

Drug Safety

### **Authors**

Rhian McNaughton, Elizabeth Lynn, Vicki Osborne, Abigail Coughtrie, Deborah Layton, Saad Shakir

### **Corresponding author**

Dr Rhian McNaughton  
Drug Safety Research Unit (DSRU)  
Bursledon Hall  
Blundell Lane  
Southampton  
SO31 1AA  
United Kingdom  
rhianejones@hotmail.com

**PARENT/LEGAL GUARDIAN  
INFORMED CONSENT FORM**

Please send this form back to the DSRU together with any assent forms your child may have signed, if appropriate.

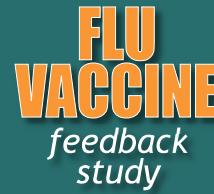

A Postmarketing  
Noninterventonal Cohort  
Study of the Safety of  
Live Attenuated Influenza  
Vaccine (LAIV) in Subjects 2  
Through 17 Years of Age.

Patient Study Identification Code

PSIC: P

Vaccination Site Identification Code

VSIC: V

**MAIN CONSENT FORM**

**PATIENT DETAILS ►**

Personal details of person vaccinated (vaccinee)

Forename:

Surname:

Date of birth:

Gender:

NHS number (if known):

Personal details of representative (e.g. parent/guardian/next of kin) of person vaccinated

Forename:

Surname:

Address:

Relationship to person vaccinated:

Email Address:

Contact telephone number:

State the preferred method for completion of study questionnaires:

Paper (Surface mail):  Email:

I wish to receive a pre-paid voucher for my participation in the study

I do not wish to receive a pre-paid voucher and would like the DSRU to donate to a children's charity of their choice on my behalf

**Please initial boxes below ▼**

1. I confirm that I have read and understand the information sheet for the above study. I have had the opportunity to consider the information and ask questions, and have had these answered satisfactorily.

2. I understand that my child's participation is voluntary and that my child is free to withdraw at any time, without giving any reason, without their medical care or legal rights being affected.

3. I give permission for relevant parts of my child's GP medical charts to be accessed by their GP or other care team staff in connection with this study.

**INFORMED CONSENT  
FORM ►**

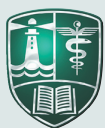

Drug Safety Research Unit  
Bursledon Hall, Blundell Lane,  
Southampton, Hampshire SO31 1AA  
Tel: (023) 8040 8600  
www.dsru.org

MAIN CONSENT FORM

Please initial box below ▼

4. I agree to my child's GP being contacted to find out more information about any side effects experienced following vaccination.

**GP CONTACT DETAILS**

Name:

Address:

Postcode:

Telephone No:

Please initial boxes below ▼

5. I agree to information, from which my child can be identified, being held by the research team at the Drug Safety Research Unit together with data collected during the study.

6. I agree for my child to take part in the study.

7. I agree for the research team to contact me in the future about further Drug Safety Research studies.

Name of child

.....

Name of child's legal representative (PRINT)      Signature

Date

.....

Patient Study Identification Code

PSIC: P

Vaccination Site Identification Code

VSIC: V

**Please return to:** Flu Vaccine Feedback study, FREEPOST RTJZ-CHEH-HKRH, Drug Safety Research Unit, Bursledon Hall, Blundell Lane, Southampton, Hampshire, SO31 1AA. Tel: (023) 8040 8600

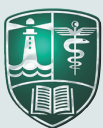

# INFORMED CONSENT FORM FOR PARTICIPANTS AGED 16-17 YEARS

Please send this form back to the DSRU

**FLU  
VACCINE**  
feedback  
study

A Postmarketing  
Noninterventonal Cohort  
Study of the Safety of  
Live Attenuated Influenza  
Vaccine (LAIV) in Subjects 2  
Through 17 Years of Age.

Patient Study Identification Code

PSIC: P

Vaccination Site Identification Code

VSIC: V

## MAIN CONSENT FORM PATIENT DETAILS ►

### Personal details of person vaccinated (vaccinee)

Forename:

Surname:

Date of birth:

Gender:

NHS number (if known):

Address:

Email address:

Contact telephone number:

### State the preferred method for completion of study questionnaires:

Paper (Surface mail):

Email:

I wish to receive a pre-paid voucher for my participation in the study

I do not wish to receive a pre-paid voucher and would like the DSRU to donate to a children's charity of their choice on my behalf

## INFORMED CONSENT FORM ►

### Please initial boxes below ▼

1. I confirm that I have read and understand the information sheet for the above study. I have had the opportunity to consider the information and ask questions, and have had these answered satisfactorily.

2. I understand that my participation is voluntary and that I am free to withdraw at any time, without giving any reason, without my medical care or legal rights being affected.

3. I give permission for relevant parts of my GP medical charts to be accessed by my GP or other care team staff in connection with this study.

4. I agree to my GP being contacted to find out more information about any side effects experienced following vaccination

### GP CONTACT DETAILS

Name:

Address:

Postcode:

Telephone No:



Drug Safety Research Unit  
Bursledon Hall, Blundell Lane,  
Southampton, Hampshire SO31 1AA  
Tel: (023) 8040 8600  
www.dsrु.org

Please initial boxes below ▼

5. I agree to information, from which I can be identified, being held by the research team at the Drug Safety Research Unit together with data collected during the study.
6. I agree to take part in the study.
7. I agree for the research team to contact me in the future about further Drug Safety Research studies.

Name (PRINT)

Signature

Date

.....

Patient Study Identification Code (PSIC)

PSIC: P

Vaccination Site Identification Code (VSIC)

VSIC: V

**Please return to:** Flu Vaccine Feedback study, FREEPOST RTJZ-CHEH-HKRH,  
Drug Safety Research Unit, Bursledon Hall, Blundell Lane, Southampton, Hampshire, SO31 1AA.  
Tel: (023) 8040 8600



Return Address: Flu Vaccine Feedback study,  
 FREEPOST RTJZ-CHEH-HKRH, Drug Safety Research Unit, Bursledon Hall,  
 Blundell Lane, Southampton, Hampshire, SO31 1AA

**Please fill out form below and send to the address above  
 or in the pre printed envelope provided**

# FLU VACCINE feedback study

A Postmarketing  
 Noninterventonal Cohort  
 Study of the Safety of  
 Live Attenuated Influenza  
 Vaccine (LAIV) in Subjects 2  
 Through 17 Years of Age.

## ENROLMENT QUESTIONNAIRE

PSIC: P

### VACCINATION DETAILS

Has the vaccinee had the nasal 'flu vaccination?

|                                              |                          |    |                          |
|----------------------------------------------|--------------------------|----|--------------------------|
| Yes ▼                                        | <input type="checkbox"/> | No | <input type="checkbox"/> |
| If <b>YES</b> , specify date of vaccination: |                          |    |                          |

Location (address) of vaccination site:

|  |
|--|
|  |
|  |
|  |
|  |
|  |

Did the vaccinee have another vaccination on the same day as the nasal 'flu vaccine?

|                                       |                          |    |                          |
|---------------------------------------|--------------------------|----|--------------------------|
| Yes ▼                                 | <input type="checkbox"/> | No | <input type="checkbox"/> |
| If <b>YES</b> , specify vaccine name: |                          |    |                          |

Has the vaccinee had any other vaccines in the last month?

|                                                                                  |                          |    |                          |
|----------------------------------------------------------------------------------|--------------------------|----|--------------------------|
| Yes ▼                                                                            | <input type="checkbox"/> | No | <input type="checkbox"/> |
| If <b>YES</b> , provide further information on the type of vaccination and date? |                          |    |                          |
| Vaccine name:                                                                    |                          |    |                          |
| Date:                                                                            |                          |    |                          |

### MEDICAL CONDITIONS

Does the vaccinee have any of the following chronic underlying medical conditions (as diagnosed by a medical professional)?

|                               |     |                          |    |                          |
|-------------------------------|-----|--------------------------|----|--------------------------|
| Asthma                        | Yes | <input type="checkbox"/> | No | <input type="checkbox"/> |
| Diabetes                      | Yes | <input type="checkbox"/> | No | <input type="checkbox"/> |
| Heart disease                 | Yes | <input type="checkbox"/> | No | <input type="checkbox"/> |
| Chronic kidney disease        | Yes | <input type="checkbox"/> | No | <input type="checkbox"/> |
| Immunosuppression             | Yes | <input type="checkbox"/> | No | <input type="checkbox"/> |
| Moderate/severe liver disease | Yes | <input type="checkbox"/> | No | <input type="checkbox"/> |
| Blood disorder                | Yes | <input type="checkbox"/> | No | <input type="checkbox"/> |

### PREGNANCY

Is the vaccinee currently pregnant?

|                                                         |                          |    |                          |
|---------------------------------------------------------|--------------------------|----|--------------------------|
| Yes ▼                                                   | <input type="checkbox"/> | No | <input type="checkbox"/> |
| If <b>YES</b> , provide expected date of delivery Date: |                          |    |                          |

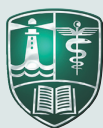

Drug Safety Research Unit  
 Bursledon Hall, Blundell Lane,  
 Southampton, Hampshire SO31 1AA  
 Tel: (023) 8040 8600  
 www.dsru.org

ENROLMENT QUESTIONNAIRE

MEDICATION

Does the vaccinee take any medicines prescribed by the doctor or over-the-counter medicines?

Yes ▼  No

If **YES**, give details of medicines in the table below:

|            | Name of Medicine | Dose | How often taken |
|------------|------------------|------|-----------------|
| Medicine 1 |                  |      |                 |
| Medicine 2 |                  |      |                 |
| Medicine 3 |                  |      |                 |
| Medicine 4 |                  |      |                 |
| Medicine 5 |                  |      |                 |

FURTHER CONTACT

a. Are you happy for us to contact you again to find out more information about any reported problems following the vaccination?

Yes  No

b. Are you happy for us to contact the vaccinee's GP or health professionals to find out more information about prescriptions and any possible side effects relating to the vaccine?

Yes  No

c. Are you happy for us to contact you again in future about further drug safety research studies?

Yes  No

**Thank you for completing this questionnaire**

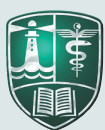

Return Address: Flu Vaccine Feedback study,  
 FREEPOST RTJZ-CHEH-HKRH, Drug Safety Research Unit,  
 Bursledon Hall, Blundell Lane, Southampton, Hampshire, SO31 1AA

**Please fill out form below and send to the address above**

# FLU VACCINE feedback study

A Postmarketing  
 Noninterventional Cohort  
 Study of the Safety of  
 Live Attenuated Influenza  
 Vaccine (LAIV) in Subjects 2  
 Through 17 Years of Age.

## DAY 14 QUESTIONNAIRE

PSIC: P

### SYMPTOMS SINCE VACCINATION

Did the vaccinee experience any of the following, either on the day of vaccination (after being vaccinated) or during the subsequent 14 days?

|                                                                                                                                                        | No                       | Yes                           | Date* symptom started | Date symptom stopped |
|--------------------------------------------------------------------------------------------------------------------------------------------------------|--------------------------|-------------------------------|-----------------------|----------------------|
| High temperature (i.e. greater than 38.0°C)                                                                                                            | <input type="checkbox"/> | <input type="checkbox"/><br>▼ |                       |                      |
| If <b>YES</b> , then give temperature recorded, if available:                                                                                          | temp:                    |                               |                       |                      |
| Nausea and vomiting                                                                                                                                    | <input type="checkbox"/> | <input type="checkbox"/>      |                       |                      |
| Generally feeling unwell (malaise)                                                                                                                     | <input type="checkbox"/> | <input type="checkbox"/>      |                       |                      |
| Headache                                                                                                                                               | <input type="checkbox"/> | <input type="checkbox"/>      |                       |                      |
| Decreased appetite                                                                                                                                     | <input type="checkbox"/> | <input type="checkbox"/>      |                       |                      |
| Rash                                                                                                                                                   | <input type="checkbox"/> | <input type="checkbox"/>      |                       |                      |
| Muscle pain or joint pain                                                                                                                              | <input type="checkbox"/> | <input type="checkbox"/>      |                       |                      |
| Itchy or red eyes                                                                                                                                      | <input type="checkbox"/> | <input type="checkbox"/>      |                       |                      |
| Any of the following: Swelling of the face, lips or tongue, difficulty breathing, feeling of dizziness/light-headedness, general itchiness with a rash | <input type="checkbox"/> | <input type="checkbox"/>      |                       |                      |
| Wheezing                                                                                                                                               | <input type="checkbox"/> | <input type="checkbox"/>      |                       |                      |
| Nasal congestion / runny nose                                                                                                                          | <input type="checkbox"/> | <input type="checkbox"/>      |                       |                      |
| Mouth or throat pain                                                                                                                                   | <input type="checkbox"/> | <input type="checkbox"/>      |                       |                      |
| Cough                                                                                                                                                  | <input type="checkbox"/> | <input type="checkbox"/>      |                       |                      |
| Nosebleed                                                                                                                                              | <input type="checkbox"/> | <input type="checkbox"/>      |                       |                      |
| Increased irritability (if the child is between two and four years)                                                                                    | <input type="checkbox"/> | <input type="checkbox"/>      |                       |                      |
| Increased crying (if the child is between two and four years)                                                                                          | <input type="checkbox"/> | <input type="checkbox"/>      |                       |                      |

*\*If you're unsure of the date, provide the approximate number of days after vaccination when the symptom started and how long (how many days) symptoms lasted.*

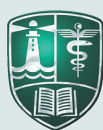

Drug Safety Research Unit  
 Bursledon Hall, Blundell Lane,  
 Southampton, Hampshire SO31 1AA  
 Tel: (023) 8040 8600  
 www.dsru.org



MEDICATION

Are there any other symptoms that the vaccinee has experienced since vaccination?

|       |                          |    |                          |
|-------|--------------------------|----|--------------------------|
| Yes ▼ | <input type="checkbox"/> | No | <input type="checkbox"/> |
|-------|--------------------------|----|--------------------------|

If **YES**, give details of symptoms and date symptoms started:

|  |
|--|
|  |
|  |
|  |

Has the vaccinee visited the GP about any of the symptoms listed above?

|     |                          |    |                          |
|-----|--------------------------|----|--------------------------|
| Yes | <input type="checkbox"/> | No | <input type="checkbox"/> |
|-----|--------------------------|----|--------------------------|

Has the vaccinee been admitted to hospital with any of the symptoms listed above?

|     |                          |    |                          |
|-----|--------------------------|----|--------------------------|
| Yes | <input type="checkbox"/> | No | <input type="checkbox"/> |
|-----|--------------------------|----|--------------------------|

Have there been any changes to the vaccinee's medication since receiving the vaccination ?

|       |                          |    |                          |
|-------|--------------------------|----|--------------------------|
| Yes ▼ | <input type="checkbox"/> | No | <input type="checkbox"/> |
|-------|--------------------------|----|--------------------------|

If **YES**, give details of medicines and date of change

|  |
|--|
|  |
|  |
|  |

**Thank you for completing this questionnaire**



Did the patient visit you about the symptoms/event described in the covering letter?

|                                                                                 |                          |    |                          |
|---------------------------------------------------------------------------------|--------------------------|----|--------------------------|
| Yes ▼                                                                           | <input type="checkbox"/> | No | <input type="checkbox"/> |
| If <b>YES</b> , provide any further details you have of the event, including:   |                          |    |                          |
| Date of onset of event:                                                         | d                        | d  | / m m / y y y y          |
| Date of end of event:                                                           | d                        | d  | / m m / y y y y          |
| Detailed clinical description (for multiple events please describe separately): |                          |    |                          |
| Diagnosis:                                                                      |                          |    |                          |
|                                                                                 |                          |    |                          |
|                                                                                 |                          |    |                          |
| Management and final outcome:                                                   |                          |    |                          |
|                                                                                 |                          |    |                          |
|                                                                                 |                          |    |                          |

Did the patient report symptoms stated above before vaccination with live attenuated influenza vaccine Fluenz Tetra®?

|     |                          |    |                          |
|-----|--------------------------|----|--------------------------|
| Yes | <input type="checkbox"/> | No | <input type="checkbox"/> |
|-----|--------------------------|----|--------------------------|

At the time of the event, was the patient taking any other prescribed medication?

|                                                     |                          |      |                          |
|-----------------------------------------------------|--------------------------|------|--------------------------|
| Yes ▼                                               | <input type="checkbox"/> | No   | <input type="checkbox"/> |
| If <b>YES</b> , list drugs including form and dose: |                          |      |                          |
| Drug                                                | Form                     | Dose |                          |
|                                                     |                          |      |                          |
|                                                     |                          |      |                          |
|                                                     |                          |      |                          |

At the time of the event, was the patient known to be taking food supplements, Over-The-Counter (OTC) or herbal therapies?

|                                |                          |    |                          |    |                          |
|--------------------------------|--------------------------|----|--------------------------|----|--------------------------|
| Yes ▼                          | <input type="checkbox"/> | No | <input type="checkbox"/> | DK | <input type="checkbox"/> |
| If <b>YES</b> , list products: |                          |    |                          |    |                          |
|                                |                          |    |                          |    |                          |
|                                |                          |    |                          |    |                          |

List any relevant past medical history including recent immunisations and medical conditions:

|  |
|--|
|  |
|  |
|  |
|  |



GP FOLLOW-UP QUESTIONNAIRE

Do you think the event was related to the vaccination?

|                                                |                               |                             |
|------------------------------------------------|-------------------------------|-----------------------------|
| Yes <input type="checkbox"/>                   | No ▼ <input type="checkbox"/> | DK <input type="checkbox"/> |
| If <b>NO</b> , was another cause established?: |                               |                             |
| Yes ▼ <input type="checkbox"/>                 | No <input type="checkbox"/>   | DK <input type="checkbox"/> |
| If <b>YES</b> , specify cause of event:        |                               |                             |
|                                                |                               |                             |
|                                                |                               |                             |
|                                                |                               |                             |

Provide the batch number of the Fluenz Tetra® vaccine administered to the patient, if known:

|      |
|------|
| Lot: |
|------|

Please return this questionnaire and copies of any relevant hospital correspondence in the FREEPOST envelope provided.

**Thank you for your assistance.**



Supplement: 40264_2015_384_MOESM1_ESM.pdf [file 40264_2015_384_MOESM1_ESM.pdf]
