# Supplementary material for: Safety of Intranasal Quadrivalent Live Attenuated Influenza Vaccine (QLAIV) in Children and Adolescents: A Pilot Prospective Cohort Study in England
Source: PubMed Central journal article supplement — Drug Saf. 2016 Jan 21;39:323–33. doi: 10.1007/s40264-015-0384-7 (PMC4796333; doi:10.1007/s40264-015-0384-7), 2016-01-21
Supplement: 40264_2015_384_MOESM2_ESM.pdf [file 40264_2015_384_MOESM2_ESM.pdf]

## **Electronic Supplementary Material 2**

### **Article Title**

Safety of Intranasal Quadrivalent Live Attenuated Influenza Vaccine (QLAIV) in Children and Adolescents: A Post Marketing Prospective Cohort Study in England in the 2014-15 season

### **Journal**

Drug Safety

### **Authors**

Rhian McNaughton, Elizabeth Lynn, Vicki Osborne, Abigail Coughtrie, Deborah Layton, Saad Shakir

### **Corresponding author**

Dr Rhian McNaughton  
Drug Safety Research Unit (DSRU)  
Bursledon Hall  
Blundell Lane  
Southampton  
SO31 1AA  
United Kingdom  
rhianejones@hotmail.com

**Supplementary Table 1.** Crude risks and incidence rates of AEs for total evaluable cohort (N=385), in patients with or without asthma

| Targeted Event <sup>a</sup>                                                                                                                            | Patients with Asthma (N=85)            |                                         |                                                  | Patients without Asthma (N=299)        |                                         |                                                  |
|--------------------------------------------------------------------------------------------------------------------------------------------------------|----------------------------------------|-----------------------------------------|--------------------------------------------------|----------------------------------------|-----------------------------------------|--------------------------------------------------|
|                                                                                                                                                        | Incidence n (%) <sup>b</sup><br>95%CI* | Total time at risk (weeks) <sup>c</sup> | Incidence rate per 1000 patient-weeks (95% CI)** | Incidence n (%) <sup>b</sup><br>95%CI* | Total time at risk (weeks) <sup>c</sup> | Incidence rate per 1000 patient-weeks (95% CI)** |
| High temperature (i.e. greater than 38.0°C)                                                                                                            | 10 (11.8)<br>[5.8, 20.6]               | 155.5                                   | 57.9 (30.1, 111.2)<br>n=9                        | 31 (10.4)<br>[7.2, 14.4]               | 549.6                                   | 54.6 (38.2, 78.1)<br>n=30                        |
| Nausea and vomiting                                                                                                                                    | 6 (7.1)<br>[2.6, 14.7]                 | 163.3                                   | 36.7 (16.5, 81.8)<br>n=6                         | 15 (5.0)<br>[2.8, 8.1]                 | 576.5                                   | 20.8 (11.8, 36.7)<br>n=12                        |
| Generally feeling unwell (malaise)                                                                                                                     | 21 (24.7)<br>[16.0, 35.3]              | 135.8                                   | 132.6 (83.5, 210.4)<br>n=18                      | 66 (22.1)<br>[17.5, 27.2]              | 494.2                                   | 121.4 (94.3, 156.4)<br>n=60                      |
| Headache                                                                                                                                               | 13 (15.3)<br>[8.4, 24.7]               | 147.7                                   | 81.2 (46.1, 143.0)<br>n=12                       | 25 (8.4)<br>[5.5, 12.1]                | 560.4                                   | 41.0 (27.3, 61.8)<br>n=23                        |
| Decreased appetite                                                                                                                                     | 9 (10.6)<br>[5.0, 19.2]                | 156.5                                   | 51.1 (25.6, 102.2)<br>n=8                        | 44 (14.7)<br>[10.9, 19.2]              | 529.0                                   | 73.7 (53.9, 100.9)<br>n=39                       |
| Rash                                                                                                                                                   | 0 (0.0)                                | 170.0                                   | -                                                | 8 (2.7)<br>[1.2, 5.2]                  | 585.6                                   | 12.0 (5.7, 25.1)<br>n=7                          |
| Muscle pain or joint pain                                                                                                                              | 8 (9.4)<br>[4.2, 17.7]                 | 156.8                                   | 38.3 (17.2, 85.2)<br>n=6                         | 14 (4.7)<br>[2.6, 7.7]                 | 579.9                                   | 22.4 (13.0, 38.6)<br>n=13                        |
| Any of the following: Swelling of the face, lips or tongue, difficulty breathing, feeling of dizziness/light-headedness, general itchiness with a rash | 2 (2.4)<br>[0.3, 8.2]                  | 166.1                                   | 12.0 (3.0, 48.1)<br>n=2                          | 3 (1.0)<br>[0.2, 2.9]                  | 593.5                                   | 5.1 (1.6, 15.7)<br>n=3                           |
| Wheezing                                                                                                                                               | 8 (9.4)<br>[4.2, 17.7]                 | 159.6                                   | 50.1 (25.1, 100.2)<br>n=8                        | 1 (0.3)<br>[0.1, 1.8]                  | 596.1                                   | 1.7 (0.2, 11.9)<br>n=1                           |
| Nasal congestion/runny nose                                                                                                                            | 39 (45.9)<br>[35.0, 57.0]              | 110.1                                   | 327.1 (235.9, 453.4)<br>n=36                     | 127 (42.5)<br>[36.8, 48.3]             | 399.1                                   | 305.7 (256.0, 365.1)<br>n=122                    |
| Mouth or throat pain                                                                                                                                   | 10 (11.8)<br>[5.8, 20.6]               | 159.7                                   | 62.6 (33.7, 116.4)<br>n=10                       | 29 (9.7)<br>[6.6, 13.6]                | 556.0                                   | 43.2 (28.9, 64.4)<br>n=24                        |
| Cough                                                                                                                                                  | 19 (22.4)<br>[14.0, 32.7]              | 146.3                                   | 129.9 (82.8, 203.6)<br>n=19                      | 61 (20.4)<br>[16.0, 25.4]              | 518.3                                   | 115.8 (89.9, 149.1)<br>n=60                      |
| Nosebleed                                                                                                                                              | 3 (3.5)<br>[0.7, 10.0]                 | 165.8                                   | 18.1 (5.8, 56.1)<br>n=3                          | 6 (2.0)<br>[0.7, 4.3]                  | 588.1                                   | 10.2 (4.6, 22.7)<br>n=6                          |
| Increased irritability (if the child is between two and four years; n=193)                                                                             | 3 (33.3)<br>[7.5, 70.1]                | 14.1                                    | 213.2 (68.8, 661.0)<br>n=3                       | 41 (22.3)<br>[16.5, 29.0]              | 298.9                                   | 117.1 (84.1, 163.1)<br>n=35                      |
| Increased crying (if the child is between two and four years; n=193)                                                                                   | 4 (44.4)<br>[13.7, 78.8]               | 12.1                                    | 248.5 (80.2, 770.6)<br>n=3                       | 23 (12.5)<br>[8.1, 18.2]               | 331.8                                   | 60.3 (38.9, 93.4)<br>n=20                        |

<sup>a</sup> Counts include events reported as free text; <sup>b</sup> denominator of total cohort with past medical history of asthma at risk at start; <sup>c</sup> denominator person-time censored at event ; \*CI: binomial exact methods; \*\*CI: poisson exact method
